# Supplementary material for: Characterization of Two AGAMOUS-like Genes and Their Promoters from the Cymbidium faberi (Orchidaceae)
Source: MDPI journal article supplement (doi:10.3390/plants12142740), 2023-07-24
Supplement: s1 [file s1]

## Supplementary Materials

**Supplementary Table S1:** Primers used in this study.

| Primer name | Primer sequence (from 5' to 3')                         |
|-------------|---------------------------------------------------------|
| CyfaAG1F    | GTCTTCTCAGTCAGGAAAC                                     |
| CyfaAG1R    | GGACTTGAGGAAACTCATC                                     |
| 3RGSPAG2F   | ATGGGGAGGGGGAAGATAGAGAT                                 |
| CyfaAG2F    | AGTCGACTATGATGGAGCCAA                                   |
| CyfaAG2R    | ATCTCCATCAATGCAACTCTC                                   |
| pAG1SP1     | TGCATATTCATAAAGGCGACACGGC                               |
| pAG1SP2     | CGACCTCAGCATCACAGAGAACA                                 |
| pAG1SP3     | TCTCTTGATCTCTATCTTCCCCCTCC                              |
| pAG1SP4     | GAACCACCTCTTATTTACACTTCGAG                              |
| pAG1SP5     | CTCAAAGCAAGCAGCAATGGCCTCA                               |
| pAG1SP6     | GCCTGAGCTGCACTCACACTAATAT                               |
| pAG2SP1     | GAGGCTTCTTGTCATGTAATACTGCGC                             |
| pAG2SP2     | CCTTCACACTGTTATTGGCATAAC                                |
| pAG2SP3     | TACAGAAGGTGACTTGCCTGTTT                                 |
| pAG2SP4     | TTGTGCTTGCTGCGCTTCTTCTCC                                |
| pAG2SP5     | TTAGATGATGGGTGGGCACTAGAG                                |
| pAG2SP6     | TGGCGTTTGAATACGACGTTGGAC                                |
| pAG2SP7     | GTTTGAAAGGGCAGCCATGACAG                                 |
| pAG2SP8     | CTAGTTTCACCCACATTCTCGTCG                                |
| pAG2SP9     | CTTGCAAGTTTACATGGATTAGACC                               |
| 5RAG1GSP1   | ATGCTGATGCTGCTGTGCTC                                    |
| 5RAG1GSP2   | CTACGCAGGTACATGTTATCAGTTTGG                             |
| 5RAG1GSP3   | GCATCACCCAGTAAGTTCCTGTTG                                |
| 5RAG2GSP1   | GTTTATGTGTGGCTGCTGT                                     |
| 5RAG2GSP2   | CGGAGGTACATGTTGTCGTTTTGCAGT                             |
| 5RAG2GSP3   | CCCATCAGATTCCTGTTTGAGTTC                                |
| TpCyfaAG1F  | ATGATTACGAATTC <u>GAGCT</u> CCCACCATTTTAATGTTATAGAAA    |
| TpCyfaAG1F1 | ATGATTACGAATTC <u>GAGCT</u> CATAGAAATTATATGAGAACTTCA    |
| TpCyfaAG1F2 | ATGATTACGAATTC <u>GAGCT</u> CAGATCAATGGTAGTAGCCAGTTA    |
| TpCyfaAG1R  | TCTGCAGGTCGACT <u>TCTAGAG</u> TTCCTTCCAACAGGAAAAATCAAC  |
| TpCyfaAG2F  | ATGATTACGAATTC <u>GAGCT</u> CGTCGAGTTTGGAGTTATAGTTTTAAG |
| TpCyfaAG2F1 | ATGATTACGAATTC <u>GAGCT</u> CGAGTTTTCCTAGCAAACATGAT     |
| TpCyfaAG2F  | ATGATTACGAATTC <u>GAGCT</u> CGCTTCAAGACTTATCAGCTTAA     |
| TpCyfaAG2R  | TCTGCAGGTCGACT <u>TCTAGA</u> AGTCGACTCCGTTGGTCCCTCC     |
| qGUSF       | GTTCTGCGACGCTCACACCGATA                                 |
| qGUSR       | CAGCCATGCACACTGATACTCTTC                                |
| qActinF     | GACCGTATGAGCAAAGAGATC                                   |
| qActinR     | CACATCTGTTGGAAGGTGCT                                    |

|             |                             |
|-------------|-----------------------------|
| qCyfaAG1F   | CCTGCGTAGTAAGATAGCTGACAATG  |
| qCyfaAG1R   | GCAGTCTGTTGCTGGTGAGAATAATG  |
| qCyfaAG2F   | GGGAGATGGAAGCTGCAAAACGAC    |
| qCyfaAG2R   | GCTGTTGGAGAGAATAGTGATGGCTG  |
| qCyfaactinF | AAGACTTACACCAAGCCGAAGAAGATC |
| qCyfaactinR | CCAGCTCCACAGGTTGCGTTAG      |

**Supplementary Table S2:** Information on Sequences selected for alignments and phylogenetic analyses from NCBI GenBank.

| Taxon and species                 | Protein name | Accession numbers | Lineage |
|-----------------------------------|--------------|-------------------|---------|
| Magnoliaceae                      |              |                   |         |
| <i>Nymphaea tetragona</i>         | MsAG         | ALF02827.1        | AG      |
| <i>Magnolia wufengensis</i>       | MawuAG1      | QDF82834.1        | AG      |
|                                   | MawuAG2      | QDF82835.1        | AG      |
|                                   | MawuSTK      | QDF82836.1        | D       |
| Liliaceae                         |              |                   |         |
| <i>Lilium longiflorum</i>         | LMADS10      | AIJ29174.1        | AG      |
|                                   | LMADS2       | AAS01766.1        | AGL11   |
| Orchidaceae                       |              |                   |         |
| <i>Cymbidium ensifolium</i>       | CeMADS1      | ADP00515.1        | AG      |
|                                   | CeMADS2      | ADP00516.1        | AG      |
| <i>Cymbidium faberi</i>           | CyfaAG1      | QDF44723.1        | AG      |
|                                   | CyfaAG2      | QDF44724.1        | AG      |
|                                   | CfSTK        | QDF44725.1        | D       |
| <i>Cymbidium sinense</i>          | CsAG1        | AVP27263.1        | AG      |
|                                   | CsAG2        | AVP27264.1        | AG      |
| <i>Dendrobium thyrsiflorum</i>    | DthyrAG1     | AAY86364.1        | AG      |
|                                   | DthyrAG2     | AAY86365.1        | D       |
| <i>Dendrobium hybrid cultivar</i> | DOAG1        | AXB26295.1        | AG      |
|                                   | DOAG2        | AXB26296.1        | D       |
| <i>Oncidium hybrid</i>            | OMADS2       | AIJ29175.1        | AGL11   |
|                                   | OMADS4       | AIJ29176.1        | AG      |
| Asparagaceae                      |              |                   |         |
| <i>Hyacinthus orientalis</i>      | HAG1         | AAD19360.2        | AG      |
| Gramineae                         |              |                   |         |
| <i>Zea mays</i>                   | ZAG1         | AAA02933.1        | AG      |
|                                   | ZMM2         | AAB81103.1        | AG      |
|                                   | ZMM23        | CAD23413.1        | AG      |

|                 |                              |           |            |         |
|-----------------|------------------------------|-----------|------------|---------|
|                 | <i>Oryza sativa</i>          | OsMADS3   | Q40704.1   | AG      |
|                 |                              | OsMADS58  | BAE54300.1 | AG      |
|                 |                              | OsMADS13  | Q2QW53.2   | AG      |
| Eupteleaceae    | <i>Euptelea pleiosperma</i>  | EUplAG1   | ADC79698.1 | AG      |
|                 |                              | EUplAG2   | ADC79699.1 | AG      |
| Lardizabalaceae | <i>Akebia trifoliata</i>     | AktAG1    | AAT46102.1 | AG      |
|                 |                              | AktAG2    | AAT46096.1 | AGL11   |
| Altingiaceae    | <i>Liquidambar formosana</i> | LAG       | AAD38119.1 | PLE     |
| Vitaceae        | <i>Vitis vinifera</i>        | Vvmads1   | AAK58564.1 | PLE     |
| Fabaceae        | <i>Medicago truncatula</i>   | MtAGa     | AIT11837.1 | euAG    |
|                 |                              | MtAGb     | AIT11838.1 | euAG    |
|                 |                              | MtSHP     | AFU81372.1 | PLE     |
| Rosaceae        | <i>Prunus persica</i>        | PpMADS4   | AAU29513.1 | euAG    |
|                 |                              | PPERSTK   | ABQ85556.1 | D/AGL11 |
|                 |                              | PPERSHP   | ABG75908.1 | PLE     |
|                 | <i>Prunus lannesiana</i>     | PrseAG    | ADK95058.1 | euAG    |
|                 |                              | PrseSTK   | ADD91578.1 | AGL11/D |
|                 |                              | PrseSHP   | ADG45819.1 | PLE     |
|                 | <i>Geum rupestre</i>         | TrAG      | ABB59994.1 | euAG    |
|                 |                              | TrSHP     | ABB59995.1 | PLE     |
|                 | <i>Rosa rugosa</i>           | MASAKO D1 | BAA90743.1 | PLE     |
|                 |                              | MASAKO C1 | BAA90744.1 | euAG    |
| Cucurbitaceae   | <i>Momordica dioica</i>      | MdMADS07  | AXR70629.1 | euAG    |
|                 |                              | MdMADS08  | AXR70630.1 | D       |
|                 | <i>Cucumis sativus</i>       | CUM1      | AAC08528.1 | euAG    |
|                 |                              | CUM10     | AAC08529.1 | AGL11/D |
| Salicaceae      | <i>Populus trichocarpa</i>   | PTAG1     | AAC06237.1 | euAG    |
|                 |                              | PTAG2     | AAC06238.1 | euAG    |
|                 | <i>Populus alba</i>          | PaAG1     | AZR37458.1 | euAG    |

|                |                               |         |            |         |
|----------------|-------------------------------|---------|------------|---------|
| Brassicaceae   | <i>Arabidopsis thaliana</i>   | PaAG2   | AZR37457.1 | euAG    |
|                |                               | AG      | P17839.2   | euAG    |
|                |                               | SHP1    | OAP06129.1 | PLE     |
|                |                               | SHP2    | AAU82057.1 | PLE     |
|                |                               | STK     | OA098566.1 | D       |
| Polygonaceae   | <i>Fagopyrum esculentum</i>   | FaesAG  | AFO83615.1 | euAG    |
|                |                               | FaesSTK | QLC27650.1 | D       |
| Primulaceae    | <i>Cyclamen persicum</i>      | CpAG1   | BAK18552.1 | euAG    |
|                |                               | CpAG2   | BAK18553.1 | euAG    |
|                |                               | CpSTK   | BAK09621.1 | STK     |
| Theaceae       | <i>Camellia japonica</i>      | CjAG    | AIP87050.1 | euAG    |
|                |                               |         |            |         |
| Actinidiaceae  | <i>Actinidia argute</i>       | AcarAG  | ADU15476.1 | euAG    |
| Rubiaceae      | <i>Coffea arabica</i>         | CaAG    | AHW58037.1 | euAG    |
| Gentianaceae   | <i>Gentiana scabra</i>        | GsAG1   | BAS04480.1 | PLE     |
|                |                               | GsAG2   | BAS04484.1 | PLE     |
|                |                               | GsSTK1  | BAS04473.1 | D       |
| Solanaceae     | <i>Nicotiana benthamiana</i>  | NbAG    | AFK13159.1 | euAG    |
|                |                               | NbSHP   | AFK13160.1 | PLE     |
|                | <i>Solanum lycopersicum</i>   | TAG1    | AAA34197.1 | euAG    |
|                |                               | TAGL11  | AAM33102.2 | AGL11/D |
|                |                               | TAGL1   | AAM33101.2 | PLE     |
|                | <i>Petunia hybrida</i>        | pMADS3  | CAA51417.1 | euAG    |
|                |                               | FBP7    | CAA57311.1 | D       |
|                |                               | FBP11   | CAA57445.1 | D       |
|                |                               | FBP6    | CAA48635.1 | PLE     |
|                |                               |         |            |         |
| Plantaginaceae | <i>Antirrhinum majus</i>      | FAR     | BAI68392.1 | euAG    |
|                |                               | PLE     | BAI68391.1 | PLE     |
| Oleaceae       | <i>Fraxinus pennsylvanica</i> | FpAG    | AFP99884.1 | euAG    |

|            |                                 |                        |            |            |      |
|------------|---------------------------------|------------------------|------------|------------|------|
| Asteraceae | <i>Torenia fournieri</i>        | TfFAR                  | BAG24494.1 | euAG       |      |
|            |                                 | TfPLE                  | BAG24495.1 | PLE        |      |
|            | <i>Chrysanthemum morifolium</i> | CAG1                   | BAG06959.1 | euAG       |      |
|            |                                 | CAG2                   | BAG06960.1 | euAG       |      |
|            |                                 | CAG3                   | BAG06961.1 | euAG       |      |
|            |                                 | <i>Gerbera hybrida</i> | GAGA1      | CAA08800.1 | euAG |
|            |                                 |                        | GAGA2      | CAA08801.1 | AG   |

The transcription start site (+1) is in bold and boxed. The start codon ATG is in bold and boxed. Putative cis-acting regulatory elements are in bold and underlined.

-1207 CCACCATTTT AATGTTATAG AAATTATATG AGAACTTCAA AAAATAACTT TTCATGT**GTC**  
CArG-box POLLENILELAT52 GTGANTG10

-1147 ATGCTT**TACT** TAACC<sup>+</sup>AAT TATAAAATAA TTAGCACATA ATTAATATAA AACAAAGAGCA  
CACTFTPPCA1

-1087 CAAGC**CACTA** TTCATTAGAT TGTATAATTT CTTCCATGAA GATAATAAAA ATCAT**TTATTT**  
CACTFTPPCA1 TATABOX5

-1027 TATCCCAAAT AAGCTA**TTAT TTT**AATGTGA GAAC**TTTTGT TT**ATTTTCTA TAAGATTTAA  
TATABOX5 TTTGTT motif

-967 GTGCATCCAA CTAAATAATA GAATTAAATT TTTGAAAATT TGGCTATATT TTAGATAAGT

-907 TTTTCTTTCT TAATTGATGA AACTTATAAT ACATAAGAAC TTC**TACT**ATG **AACAAA**GAAT  
CACTFTPPCA1 AACAAA motif

-847 TAATAAGTGC TTTTGATCCT ACGAAAAATC GTAT**TGACATG ACCC**AAAAA TTAACT**TACT**  
WRKY7IOS WRKY7IOS CACTFTPPCA1

-787 CAT**TTATCCC** AAA**ATTTATA TAAAT**GAAAT TAC**CAAT**GCTG AGATCTTAGA TAAAATCTCG  
SREATMSD D2GMAUX28 CAATBOX1

-727 AT**TGAAAAATA** AAATTCTAGA GGATGTGGTC ATAGTA**CAAA TGATCATATG** ATCATTCTATA  
-300ELEMENT MYCCONSENSUSAT MYCCONSENSUSAT

-667 TCATGTCCAC TAGACTAAAA AGATG**CCAAT** ATTCTTGAGC TCAAATGGCA TCGATCTAAA  
CCAATBOX1

-607 GATTTACGAT GAAAAAAAGA GC**CCAAT**CAA TCTCGATCGA TCAACATGTC ATCATCAACA  
CCAATBOX1

-547 TTAGAGAGAT TGGGTTGGGT CCATGGCCAG AAGTAGGGAG GAATAAATGG CACCTTAGAG

-487 CAAATT**GTGA** ACCACATTGA TCTTAAAATA AATTAGGCAG GGTAGC**CACA TG**GGAGCCAT  
GTGANTG10 MYCCONSENSUSAT

-427 ATTCTCTTGT **CATATGA**AGA CAAGTAAT**TTA TCC**ATCAAAA AGAT**CAAT**TGG TAGTAGCCAG  
MYCCONSENSUSAT SREATMSD CAATBOX1



-933 CTACACTAGA AATGTGAATA AATTAGAGAA TATATAAACC TATCATTTCT ATAAGTGCTA  
 POLLENILELAT52  
 -873 AATCTTTTCAG AAAGGTCTAA TCCATGTAAA ACTGCAAGAT TAATTATCTT CATGAATGAT  
 POLLENILELAT52 ARR1AT  
 -813 CCATTTACGG TAAATAAGAA GCAAGTACAC AAAGTTAAAG TAGCAACACA CA CTTAACGACG  
 CACTFTPPCA1  
 -753 AGAATGTGGG TGAAACTAGC CAGCTAATAT GCTTTAGAAG AAAGGACCTG TGATTGGTCCC  
 GTGANTG10  
 -693 AGGAGATGAT GTTGGCATTT ACGATGATCT GTCATGGCTG CCCTTTCAA CACCCACTTT  
 PROXBNNAPA  
 -633 GCATTGCAAG CCTGTTATAG CAAAATAAAC TATCTTTAGA GCTCACAGTT CATCTATGGT  
 MYBCORE  
 -573 TCTTCGATCT TAACCACAAT TAGATCTCCA AAGAATTAA GAAAATTGTA CATAATCTTA  
 MYBIAT POLLENILELAT52  
 -513 TATATCAAAG GCCATGTCAG CTCTAGCATC AGAAAAATTG CTTCCATGGC CTACATTATG  
 POLLENILELAT52  
 -453 GTGTCAAAAA ACGAATTTTA AAAATACTTA AAGCTTTATG GTTTGCAAAA GTATTTGAAT  
 -300ELEMENT  
 -393 TAAGAGTCAA AATATCAGAA AAAAATTAAT GAGCGGAAGA CAAAGGGCCA AGAATTGAAG  
 POLLENILELAT52  
 -333 AGGGAGTTGA AGGACCAATTGG CGCACTGCGT GCTTTCATCC TTCATCGTTC CTTTTGTTTT  
 CAATBOX1 CACTFTPPCA1 PYRIMIDINEBOXOSRAMY1A  
 -273 ATTTTTACATA GTATATTTGT TTGAGTGCAA TTCAGTCCAA CGTCGTATTC AAACGCCATT  
 TATABOX5 TTTGTT motif CAATBOX1  
 -213 AATAATCCCT TTCTAAAAGA CCCTTTCCCA TCTTTCTCTC TCTATCTCTT TTCTCTAGCC  
 CTRMCAMV35S  
 -153 CTCTTCTCTC TCTAGTGCCC ACCCATCATC TAATCCTTTG AAACCGATGG CAATGGTTGC  
 CTRMCAMV35S CAATBOX1  
 -93 CTGAGTTAAT AACCTGTCCT TTCATTGTAG AAAGAGAGGG AAAGCTTCAA GACTTATCAG  
 POLLENILELAT52  
 +1  
 -33 CTTAATAACC AGCAAGTTGC TCCCCTTTCC TTCAAAGAAA ACTGGCTTTC TTTCAGGCAG  
 +28 GAACCGGAGA AGAAGCGCAG CAAGCACAAC TCAATTTGCA GAGTCCGTAA ATTTAATGTT  
 CAREOSREPI  
 +88 TCTTCTTTCT CTTCAAAAAG TTGCAATTTT CGATTTCTGA AATTTATTTG TGGCTTTTTT  
 CAATBOX1 ARR1AT TATABOX5 CArG-box  
 +148 TTGTTTGTTTTGTCTGTGG AAGGACCAAC GGAGTCGACT ATG  
 TTTGTT motif MYB2CONSENSUSAT

**Supplementary Figure S3.** Genotyping of wild-type, heterozygote and homozygous *ag-1* mutant *A. thaliana* (Landsberg erecta) plants by dCAPS.

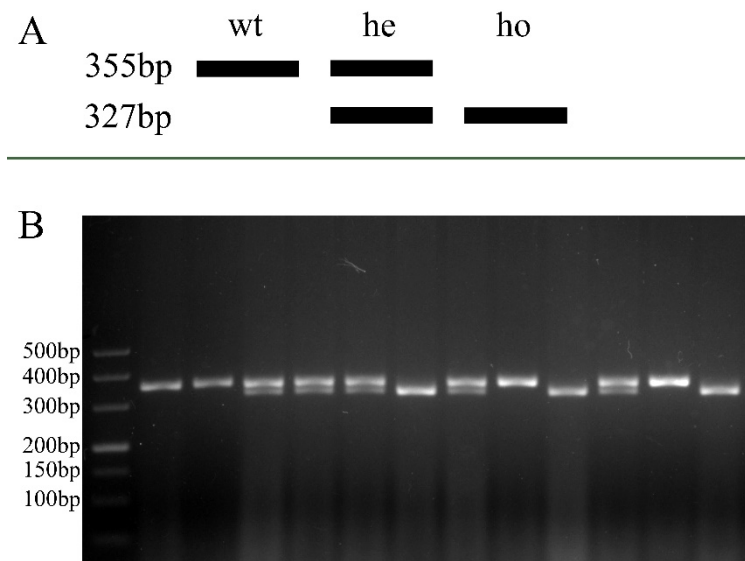

The amplicons of transgenic lines under wild-type background were cleaved By *Afl* II to produce a fragment of 355 bp fragment, the amplicons from transgenic heterozygote *ag-1 Arabidopsis* were cleaved by *Afl* II to produce a 355 bp and a 327 bp fragments, and the amplicons from transgenic homozygous *ag-1 Arabidopsis* were cleaved by *Afl* II to produce a 327 bp fragment.
